# Supplementary material for: Plot-scale evidence of tundra vegetation change and links to recent summer warming
Source: Springer Nature journal article supplement (doi:10.1038/nclimate1465), 2012-04-05
Supplement: 41558_2012_BFnclimate1465_MOESM440_ESM.pdf [file 41558_2012_BFnclimate1465_MOESM440_ESM.pdf]

## Plot-scale evidence of tundra vegetation change and links to recent summer warming

### FULL METHODS (Supplement)

#### *Sources of vegetation data:*

Data on changes in tundra plant composition at the plot level were amassed from a variety of sources including monitoring studies and control-plots from long-term experiments. Criteria for inclusion were permanently located quadrats or study areas which were sampled using the same methodology at least twice between 1980 and 2010 with a minimum of 5 years between the first and last sampling years. We omitted studies in areas undergoing obvious recovery from recent disturbance and plots with standing water, since it was difficult to sample submerged vegetation accurately. The resulting dataset consisted of 158 studies (Table S1). Studies were grouped into 46 locations; each location was associated with a unique 0.5 x 0.5 degree grid cell in the CRU TS 3.1 climate data set<sup>1</sup>. The median duration of observational record per study was 11 years (range 5-27). The median number of samplings per study was 3 (range 2-28). Since the individual studies were conducted for a variety of purposes, sampling methodology varied among studies. Eighty-two percent of the studies collected vegetation data on one-to-many permanently-marked quadrats or transects within the study area; the remaining studies sampled randomly placed quadrats within a permanently-marked study area in each sampling year. Plant abundance was quantified as: biomass (8 studies), point frame hits (total- 68 studies; top and bottom only- 15 studies; or top only- 14 studies), visual cover estimates (48 studies), subplot frequency (1 study), or stem counts (4 studies). Morphologically similar groups of taxa that were not consistently separated across all years of a given study were grouped to morphospecies (i.e. unknown moss) to permit temporal comparisons. Not every taxa or growth form category occurred or was measured at every study site or location, thus the sample sizes for vegetation

response groups vary. Height (cm) was also measured in 31 studies (10 locations), as the height of plants over a regular sampling grid in each study plot. The plant identity associated with each height was noted in 26 studies (8 locations). The full dataset has been archived at the Polar Data Catalogue<sup>2</sup>.

*Vegetation change indices:*

Due to variability in species composition among studies, we used a hierarchical growth form classification scheme to compare vegetation change across studies. For each plot in each year in each study, we calculated the following response variables: abundance of each broad (shrubs, forbs, graminoids, mosses, and lichens) and narrow vascular growth form (deciduous shrubs; evergreen shrubs; dwarf (<15cm), low (15-50cm) and tall (>50cm) shrub species; grasses; rushes; and sedges); abundance of litter (attached and unattached dead plant material); Simpson diversity of vascular taxa; the mean canopy height; and the maximum height of each vascular plant growth form. We scored abundance using the original measurement units, which varied among studies. We used maximum rather than mean height for the taxa-specific height change measurements to minimize differences due to changes in the abundance of shorter or taller species. We used two approaches to create narrow growth form categories for shrubs, based on either leaf-longevity or taxa-specific height as reported in various flora since both traits appear to influence shrub response to summer temperature warming<sup>3</sup>. Fewer than 1/3 of studies identified mosses and lichens to species or subgroup, and these studies were highly clustered in the coldest regions (almost exclusively on permafrost). As a result, we did not analyze subgroups of mosses and lichens here. Diversity analyses included only studies which identified >95% of the total abundance of vascular plants to species. Similarly, studies were omitted from

the analysis of that growth form if unidentified vegetation comprised more than 5% of the potential abundance.

For each study, we calculated the direction of change in each vegetation response metric over time as the sign of the slope of a linear model of vegetation response variables versus time (e.g. total point frame hits/year). This metric is the most conservative analysis we could apply to the dataset, and assumes only that the direction of vegetation change detected would be the same regardless of the particular method used to quantify abundance (i.e. an increase in cover would also result in increase in biomass or point frame hits and vice versa). Such an approach has been used previously in a global synthesis of treeline advancement, wherein the methods used to detect change varied among studies<sup>4</sup>. Height change rates for each study were calculated based on the slope of a regression of height (cm) over time, yielding a change rate in cm/year.

We used generalized estimating equations (GEEs) to calculate biome-wide changes in vegetation height and abundance (population-averaged responses), specifying either a binomial or gaussian error structure. Marginal models were preferable to mixed-effects modeling in this study as we were primarily interested in population-averaged responses, not responses conditioned on random effects terms<sup>5</sup>. The response variable was the study-specific direction of abundance changes (binomial response variable), or the rate of change (cm/year, continuous response variable), an intercept was the single explanatory variable, and the location was included as a grouping factor with an exchangeable correlation structure. Significance was assessed using Wald tests.

*Sources of environmental data:*

We examined vegetation change in response to summer temperature change and interactions between summer temperature change and factors that have been previously shown to moderate plant response to summer climate warming<sup>3,6-10</sup> for which reliable study-site specific data were widely available. The final suite of environmental variables we used included the summer (Jun-Aug or Dec-Feb) temperature change that occurred over the study period ( $\Delta^{\circ}\text{C}$ ), summer (Jun-Aug or Dec-Feb) mean temperature ( $^{\circ}\text{C}$ ), presence of near surface permafrost (<1m active layer depth) , and soil moisture class (dry, moist or wet). We used the monthly data provided at 0.5 degree resolution based on the University of East Anglia Climate Research Unit (CRU) TS3.1 dataset<sup>1</sup>, with a lapse rate adjustment of  $-6^{\circ}\text{C}/\text{km}$  elevation to account for differences in elevation between the actual study sites and the gridded data<sup>11</sup>. These data extend through the year 2009. We also had local meteorological data for at least some years for  $\sim 2/3$  of the studies, which we used to confirm the accuracy of the downscaled data. Based on the studies and years where both climate data sources were available, we confirmed that the absolute mean summer temperature estimates from the two sources were well correlated (Pearson  $r = 0.91$ ), as were the interannual temperature anomalies (Pearson  $r=0.89$ ). CRU data were not available for sub-Antarctic study site, so we used local meteorological station data for this study. We estimated mean summer temperature for each site over a common set of years (1996-2005), to provide inter-comparability among our datasets. We selected this decade because it overlaps with the majority of our sampling years, and because we lacked climate data from the site that lay outside the CRU map for other years. We classified each study by soil moisture class, with dry sites containing roughly <20% gravimetric soil moisture content (GMC); moist 20-60% GMC; or wet >60% GMC. Precipitation and snow are other potentially important factor in vegetation change. Unfortunately, relatively few sites had measured local precipitation or snow

duration, and the relationship between study-site specific data for these variables and gridded precipitation or snow cover datasets were weak. As a result, we did not use precipitation or snow data in our analyses.

*Summer climate change index:*

For each study, we determined summer temperature change ( $\Delta^{\circ}\text{C}$ ) as follows: First, we calculated an annual rate of summer temperature change ( $^{\circ}\text{C}/\text{year}$ ) as the slope a linear regression of summer temperature on year over the relevant time period (first through last year of vegetation monitoring in each study). We then multiplied the annual rate of summer temperature change at each study by number years between the first and last survey year in each study to generate 158 study-specific estimates of total summer temperature change ( $\Delta^{\circ}\text{C}$ ), corresponding to the relevant vegetation monitoring locations and timeframes.

*Linking vegetation change to environmental conditions:*

We used generalized estimating equations to test whether the direction of vegetation changes were correlated with local rates of summer climate warming. Based on previous reports of tundra vegetation sensitivity to summer climate warming, as well as differences in sensitivity to warming with ambient site temperature, over a soil moisture gradient, and on and off permafrost, we fitted four generalized estimating equations per vegetation response variable, with the following explanatory variables: summer temperature change; summer temperature change x mean summer temperature; summer temperature change x study site moisture; summer temperature change x permafrost. Main effects were also included in all models with interaction terms, and location was included as a grouping factor with exchangeable correlation structure.

Since repeated tests could increase the probability of Type I errors, we present results (Table S2) with and without adjusting for the false discovery rate<sup>12</sup>, but note this correction may be overly conservative, particularly since the explanatory variables were not entirely independent (studies with permafrost had lower mean summer temperatures than sites without). The single study conducted across a moisture gradient (RMBL from Table S1) was omitted from all tests that included soil moisture. We did not assess environmental correlates of change in plant height due to the low number of sites that measured heights. All analyses and plots were generated in R (version 2.11), with the packages geepack, doBy and ggplot2<sup>12-16</sup>.

#### References:

- 1 University of East Anglia Climatic Research Unit (CRU). [Phil Jones, Ian Harris]. CRU Time Series (TS) high resolution gridded datasets, [Internet]. NCAS British Atmospheric Data Centre, 2008. Available from [http://badc.nerc.ac.uk/view/badc.nerc.ac.uk\\_\\_ATOM\\_\\_dataent\\_1256223773328276](http://badc.nerc.ac.uk/view/badc.nerc.ac.uk__ATOM__dataent_1256223773328276)
- 2 The Polar Data Catalogue, Available from <http://polardata.ca/> CCIN Reference Number 10786
- 3 Elmendorf, S.C. *et al.* Global assessment of experimental climate warming on tundra vegetation: heterogeneity over space and time. *Ecol Lett.* **15**, 164-175 (2012).
- 4 Harsch, M.A. *et al.* Are treelines advancing? A global meta-analysis of treeline response to climate warming. *Ecol. Lett.* **12**, 1040-1049 (2009).
- 5 Fieberg, J., *et al.* Regression modelling of correlated data in ecology: subject-specific and population averaged response patterns. *J. Appl. Ecol.* **46**: 1018-1025 (2009)

7

6 Jia, G. J., Epstein, H. E. & Walker, D. A. Vegetation greening in the Canadian Arctic related to decadal warming. *J. Environ. Monitor.* **11**, 2231-2238 (2009).

7 Bhatt, U. S. et al. Circumpolar Arctic tundra vegetation change is linked to sea ice decline. *Earth Interactions* **14**, 1-20 (2010).

8 Schuur, E., et al. Plant species composition and productivity following permafrost thaw and thermokarst in Alaskan tundra. *Ecosystems* **10**, 280-292 (2007).

9 Natali, S. M., et al. Increased plant productivity in Alaskan tundra as a result of experimental warming of soil and permafrost. *J. Ecol.* In Press.

10 Walker, M.D. et al. Plant community responses to experimental warming across the tundra biome. *Proc. Natl. Acad. Sci. U. S. A.* **103**, 1342-1346 (2006).

11 Barry, R. G. & Chorley, R. J. Atmosphere, weather and climate (Methuen, 1987).

12 Benjamini, Y. and Hochberg, Y. Controlling the false discovery rate: a practical powerful approach to multiple testing. *J. Roy. Statist. Soc. Ser. B* **57**, 289-300 (1995).

13 Wickham, H. ggplot2: elegant graphics for data analysis. Springer New York, 2009.

14 Højsgaard, S. et al. doBy: Groupwise summary statistics, general linear contrasts, LSMEANS (least-squares-means), and other utilities. R package version 4.3.0. <http://CRAN.R-project.org/package=doBy> (2011)

15 Højsgaard, S., et al. The R Package geepack for Generalized Estimating Equations. *J. Statist. Software*, **15**, 1-11 (2005)

16 R: A language and environment for statistical computing. R Foundation for Statistical Computing (2010).

## Plot-scale evidence of tundra vegetation change and links to recent summer warming.

Table S1.

| Study            | Lat.  | Long.   | Elev. | Moisture | Perm. | Veg. Class | Sampling Metric | Years     | P.I.        | Reference                                  |
|------------------|-------|---------|-------|----------|-------|------------|-----------------|-----------|-------------|--------------------------------------------|
| ABISKOWET        | 68.35 | 18.82   | 400   | WET      | N     | W3         | PFA             | 1999-2008 | Michelsen   | Rinnan <i>et al.</i> 2007; Unpubl data     |
| PEATLAND         | 68.35 | 18.82   | 340   | MOIST    | Y     | W3         | PFA             | 2000-2008 | Cornelissen | Keuper <i>et al.</i> 2011                  |
| GA66             | 65.59 | -23.97  | 190   | DRY      | N     | G3         | COVER           | 1998-2005 | Magnusson   | Magnusson <i>et al.</i> 2005               |
| MD72             | 65.51 | -18.08  | 190   | MOIST    | N     | G3         | COVER           | 1998-2005 | Magnusson   | Magnusson <i>et al.</i> 2005               |
| SB63             | 65.45 | -18.24  | 370   | DRY      | N     | G3         | COVER           | 1998-2005 | Magnusson   | Magnusson <i>et al.</i> 2005               |
| SY59             | 65.58 | -19.84  | 320   | DRY      | N     | G3         | COVER           | 1998-2005 | Magnusson   | Magnusson <i>et al.</i> 2005               |
| CASSIOPE BIOMASS | 78.87 | -75.67  | 30    | MOIST    | Y     | P2         | BIOMASS         | 1981-2007 | Henry       | Hudson & Henry 2009                        |
| CASSIOPE COVER   | 78.87 | -75.67  | 30    | MOIST    | Y     | P2         | COVER           | 1981-2007 | Henry       | Hudson & Henry 2009                        |
| CASSIOPE ITEX    | 78.87 | -75.92  | 30    | MOIST    | Y     | P2         | PFA             | 1995-2007 | Henry       | Hudson & Henry 2009                        |
| DOLOMITE COVER   | 78.88 | -75.92  | 540   | DRY      | Y     | B4         | COVER           | 1992-2009 | Lévesque    | Levesque 1997; Unpubl. data                |
| GRANITE COVER    | 78.88 | -75.92  | 540   | DRY      | Y     | B3         | COVER           | 1992-2009 | Lévesque    | Levesque 1997; Unpubl. data                |
| DOME.D ITEX      | 78.88 | -75.92  | 540   | DRY      | Y     | B4         | PFA             | 1995-2008 | Henry       | Unpubl. data                               |
| DOME.G ITEX      | 78.88 | -75.92  | 540   | DRY      | Y     | B3         | PFA             | 1995-2008 | Henry       | Unpubl. data                               |
| DRYAS            | 78.87 | -75.67  | 30    | MOIST    | Y     | G2         | PFA             | 1995-2010 | Henry       | Unpubl. data                               |
| FERT             | 78.87 | -75.67  | 30    | MOIST    | Y     | P2         | PFA             | 1995-2010 | Henry       | Unpubl. data                               |
| MEADOW BIOMASS   | 78.87 | -75.67  | 30    | WET      | Y     | W2         | BIOMASS         | 1980-2005 | Henry       | Hill & Henry 2011                          |
| MEADOW ITEX      | 78.87 | -75.67  | 30    | WET      | Y     | W2         | PFA             | 1995-2010 | Henry       | Unpubl. Data                               |
| WILLOW           | 78.87 | -75.67  | 30    | DRY      | Y     | P2         | PFA             | 1995-2010 | Henry       | Unpubl. data                               |
| ATIGUN A         | 68.47 | -149.35 | 1190  | DRY      | Y     | P2         | PFA             | 1997-2007 | Jorgenson   | Jorgenson <i>et al.</i> 2000; Unpubl. Data |
| ATIGUN B         | 68.48 | -149.35 | 1210  | MOIST    | Y     | G3         | PFA             | 1997-2007 | Jorgenson   | Jorgenson <i>et al.</i> 2000; Unpubl. Data |
| ATIGUN C         | 68.45 | -149.32 | 885   | MOIST    | Y     | P2         | PFA             | 1997-2007 | Jorgenson   | Jorgenson <i>et al.</i> 2000; Unpubl. Data |
| H1               | 69.66 | -144.19 | 258   | MOIST    | Y     | RS         | PFA             | 1985-2009 | Jorgenson   | Jorgenson <i>et al.</i> 2010; Unpubl. data |
| H3               | 69.85 | -144.11 | 101   | MOIST    | Y     | RS         | PFA             | 1985-2009 | Jorgenson   | Jorgenson <i>et al.</i> 2010; Unpubl. data |
| H4               | 69.96 | -144.06 | 43    | DRY      | Y     | DT         | PFA             | 1985-2009 | Jorgenson   | Jorgenson <i>et al.</i> 2010; Unpubl. data |
| H5               | 69.95 | -144.06 | 50    | DRY      | Y     | DT         | PFA             | 1985-2009 | Jorgenson   | Jorgenson <i>et al.</i> 2010; Unpubl. data |
| JAGO A           | 69.70 | -143.63 | 198   | MOIST    | Y     | G4         | PFA             | 1996-2005 | Jorgenson   | Jorgenson <i>et al.</i> 1997; Unpubl. Data |
| JAGO B           | 69.71 | -143.62 | 168   | MOIST    | Y     | G3         | PFA             | 1996-2005 | Jorgenson   | Jorgenson <i>et al.</i> 1997; Unpubl. Data |
| K2               | 70.08 | -143.14 | 5     | MOIST    | Y     | G3         | PFA             | 1986-2009 | Jorgenson   | Jorgenson <i>et al.</i> 2010; Unpubl. data |
| K3               | 70.08 | -143.14 | 5     | MOIST    | Y     | G3         | PFA             | 1986-2009 | Jorgenson   | Jorgenson <i>et al.</i> 2010; Unpubl. data |
| M10              | 69.80 | -144.81 | 210   | MOIST    | Y     | G4         | PFA             | 1985-2009 | Jorgenson   | Jorgenson <i>et al.</i> 2010; Unpubl. data |
| M11              | 69.80 | -144.81 | 214   | MOIST    | Y     | G4         | PFA             | 1985-2009 | Jorgenson   | Jorgenson <i>et al.</i> 2010; Unpubl. data |
| M4               | 69.79 | -144.82 | 212   | MOIST    | Y     | RS         | PFA             | 1984-2009 | Jorgenson   | Jorgenson <i>et al.</i> 2010; Unpubl. data |
| M7S              | 69.80 | -144.84 | 207   | MOIST    | Y     | G4         | PFA             | 1985-2009 | Jorgenson   | Jorgenson <i>et al.</i> 2010; Unpubl. data |
| N11              | 69.89 | -142.87 | 83    | MOIST    | Y     | G3         | PFA             | 1984-2009 | Jorgenson   | Jorgenson <i>et al.</i> 2010; Unpubl. data |
| O11              | 69.97 | -143.90 | 37    | WET      | Y     | W2         | PFA             | 1984-2009 | Jorgenson   | Jorgenson <i>et al.</i> 2010; Unpubl. data |
| O12              | 69.97 | -143.90 | 37    | MOIST    | Y     | G3         | PFA             | 1984-2009 | Jorgenson   | Jorgenson <i>et al.</i> 2010; Unpubl. data |
| O13              | 69.83 | -143.78 | 98    | MOIST    | Y     | G3         | PFA             | 1985-2009 | Jorgenson   | Jorgenson <i>et al.</i> 2010; Unpubl. data |
| O15              | 69.83 | -143.77 | 101   | MOIST    | Y     | RS         | PFA             | 1985-2009 | Jorgenson   | Jorgenson <i>et al.</i> 2010; Unpubl. data |



Table S1 cont'd.

| Study                   | Lat.  | Long.   | Elev. | Moisture | Perm. | Veg. Class | Sampling Metric | Years     | P.I.                     | Reference                                   |
|-------------------------|-------|---------|-------|----------|-------|------------|-----------------|-----------|--------------------------|---------------------------------------------|
| O18                     | 69.97 | -143.94 | 38    | MOIST    | Y     | G3         | PFA             | 1985-2009 | Jorgenson                | Jorgenson <i>et al.</i> 2010; Unpubl. data  |
| O19                     | 69.97 | -143.94 | 38    | MOIST    | Y     | G3         | PFA             | 1985-2009 | Jorgenson                | Jorgenson <i>et al.</i> 2010; Unpubl. data  |
| O3                      | 69.97 | -143.91 | 36    | MOIST    | Y     | G3         | PFA             | 1984-2009 | Jorgenson                | Jorgenson <i>et al.</i> 2010; Unpubl. data  |
| O6                      | 69.98 | -144.05 | 35    | DRY      | Y     | DT         | PFA             | 1984-2009 | Jorgenson                | Jorgenson <i>et al.</i> 2010; Unpubl. data  |
| O7                      | 69.98 | -144.02 | 32    | MOIST    | Y     | G3         | PFA             | 1984-2009 | Jorgenson                | Jorgenson <i>et al.</i> 2010; Unpubl. data  |
| S1                      | 69.70 | -144.36 | 275   | MOIST    | Y     | G4         | PFA             | 1984-2009 | Jorgenson                | Jorgenson <i>et al.</i> 2010; Unpubl. data  |
| S4                      | 69.71 | -144.37 | 232   | MOIST    | Y     | S1         | PFA             | 1984-2009 | Jorgenson                | Jorgenson <i>et al.</i> 2010; Unpubl. data  |
| S5                      | 69.71 | -144.38 | 225   | MOIST    | Y     | RS         | PFA             | 1984-2009 | Jorgenson                | Jorgenson <i>et al.</i> 2010; Unpubl. data  |
| S6                      | 69.73 | -144.34 | 202   | MOIST    | Y     | S1         | PFA             | 1984-2009 | Jorgenson                | Jorgenson <i>et al.</i> 2010; Unpubl. data  |
| S8                      | 69.73 | -144.34 | 206   | MOIST    | Y     | G4         | PFA             | 1984-2009 | Jorgenson                | Jorgenson <i>et al.</i> 2010; Unpubl. data  |
| AD                      | 70.45 | -157.41 | 22    | DRY      | Y     | P2         | PFTB            | 1997-2007 | Hollister                | Hollister <i>et al.</i> 2005; Unpubl. data  |
| AW                      | 70.45 | -157.40 | 17    | WET      | Y     | W2         | PFTB            | 1997-2007 | Hollister                | Hollister <i>et al.</i> 2005; Unpubl. data  |
| RATE BETULA SHRUB       | 70.46 | -157.42 | 29    | MOIST    | Y     | G4         | COVER           | 2000-2009 | Webber, Tweedie, Johnson | Unpubl. data                                |
| RATE CAREX WET MEADOW   | 70.46 | -157.42 | 29    | WET      | Y     | W2         | COVER           | 2000-2009 | Webber, Tweedie, Johnson | Unpubl. data                                |
| RATE DRYAS HEATH        | 70.46 | -157.42 | 29    | DRY      | Y     | P2         | COVER           | 2000-2009 | Webber, Tweedie, Johnson | Unpubl. data                                |
| RATE HIEROCHLOE DRY ME. | 70.46 | -157.42 | 29    | DRY      | Y     | P2         | COVER           | 2000-2009 | Webber, Tweedie, Johnson | Unpubl. data                                |
| BETULAHEATH             | 65.27 | -20.25  | 480   | MOIST    | N     | S1         | PFTB            | 1997-2007 | Jónsdóttir               | Jónsdóttir <i>et al.</i> 2005; Unpubl. data |
| BD                      | 71.32 | -156.60 | 5     | MOIST    | Y     | G2         | PFTB            | 1995-2008 | Hollister                | Hollister <i>et al.</i> 2005; Unpubl. data  |
| BW                      | 71.32 | -156.60 | 3     | WET      | Y     | W1         | PFTB            | 1996-2008 | Hollister                | Hollister <i>et al.</i> 2005; Unpubl. data  |
| MICRO MOIST MEADOW      | 71.29 | -156.64 | 9     | MOIST    | Y     | G3         | COVER           | 1999-2008 | Webber, Tweedie, Johnson | Unpubl. data                                |
| MICRO WETMEADOW         | 71.29 | -156.64 | 9     | WET      | Y     | G3         | COVER           | 1999-2008 | Webber, Tweedie, Johnson | Unpubl. data                                |
| ORD ARCTOPHILA POND     | 71.29 | -156.64 | 9     | WET      | Y     | W1         | COVER           | 1999-2008 | Webber, Tweedie, Johnson | Unpubl. data                                |
| ORD DRY HEATH           | 71.29 | -156.64 | 9     | DRY      | Y     | G2         | COVER           | 1999-2008 | Webber, Tweedie, Johnson | Unpubl. data                                |
| ORD CAREX MOIST MEADOW  | 71.29 | -156.64 | 9     | MOIST    | Y     | G3         | COVER           | 1999-2008 | Webber, Tweedie, Johnson | Unpubl. data                                |
| ORD CAREX MESIC MEADOW  | 71.29 | -156.64 | 9     | MOIST    | Y     | W1         | COVER           | 1999-2008 | Webber, Tweedie, Johnson | Unpubl. data                                |
| SD33                    | 65.50 | -20.23  | 350   | MOIST    | N     | W2         | COVER           | 1997-2005 | Magnusson                | Magnusson <i>et al.</i> 2005                |
| SD34                    | 65.50 | -20.23  | 350   | MOIST    | N     | W2         | COVER           | 1997-2005 | Magnusson                | Magnusson <i>et al.</i> 2005                |
| SHEEN B                 | 68.57 | -143.72 | 1002  | MOIST    | N     | S2         | PFA             | 1998-2008 | Jorgenson                | Jorgenson <i>et al.</i> 1997; Unpubl. Data  |
| MESPOLYGON              | 73.23 | -80.00  | 70    | MOIST    | Y     | G2         | PFA             | 2002-2008 | Lévesque                 | Unpubl. data                                |
| MESPRAIRIE              | 73.23 | -80.00  | 70    | MOIST    | Y     | G2         | PFA             | 2001-2008 | Lévesque                 | Unpubl. data                                |
| AG4                     | 65.78 | -19.31  | 40    | MOIST    | N     | G3         | COVER           | 1997-2005 | Magnusson                | Magnusson <i>et al.</i> 2005                |
| KD24                    | 65.77 | -19.04  | 180   | MOIST    | N     | G3         | COVER           | 1997-2005 | Magnusson                | Magnusson <i>et al.</i> 2005                |
| KD25                    | 65.77 | -19.03  | 160   | MOIST    | N     | W2         | COVER           | 1997-2005 | Magnusson                | Magnusson <i>et al.</i> 2005                |
| KNUTSHØ                 | 62.30 | 9.62    | 1090  | DRY      | N     | S1         | COVER           | 1999-2008 | Hofgaard                 | Hofgaard <i>et al.</i> 2010                 |
| RIDGE DRYAS HEATH       | 60.37 | 7.32    | 1550  | MOIST    | N     | P1         | SUBPLFREQ       | 2000-2008 | Klanderud                | Unpubl. data; Klanderud & Totland 2007      |
| LH92                    | 64.22 | -20.60  | 80    | WET      | N     | W2         | COVER           | 1998-2005 | Magnusson                | Magnusson <i>et al.</i> 2005                |
| SH90                    | 63.98 | -20.57  | 60    | MOIST    | N     | G3         | COVER           | 1998-2005 | Magnusson                | Magnusson <i>et al.</i> 2005                |
| AH37                    | 65.07 | -20.58  | 450   | MOIST    | N     | G3         | COVER           | 1997-2005 | Magnusson                | Magnusson <i>et al.</i> 2005                |
| AH38                    | 65.08 | -20.59  | 450   | MOIST    | N     | G3         | COVER           | 1997-2005 | Magnusson                | Magnusson <i>et al.</i> 2005                |
| VH49                    | 65.14 | -20.26  | 400   | MOIST    | N     | G3         | PFTB            | 1997-2005 | Magnusson                | Magnusson <i>et al.</i> 2005                |

Table S1 cont'd.

| Study               | Lat.   | Long.   | Elev. | Moisture | Perm. | Veg. Class | Sampling Metric | Years     | P.I.                        | Reference                               |
|---------------------|--------|---------|-------|----------|-------|------------|-----------------|-----------|-----------------------------|-----------------------------------------|
| KILPISJARVI         | 69.07  | 20.82   | 670   | MOIST    | N     | S1         | PFA             | 2003-2008 | Tolvanen                    | Rinnan <i>et al.</i> 2009; Unpubl. data |
| PIKA                | 61.22  | -138.27 | 1700  | DRY      | Y     | G3         | COVER           | 1996-2007 | Koh, Hik                    | Unpubl. data                            |
| DRY HEATH           | 68.20  | 18.30   | 1000  | DRY      | N     | S1         | PFTB            | 1995-2008 | Molau                       | Molau 1997; Unpubl. data                |
| DRY MEADOW          | 68.20  | 18.30   | 1000  | DRY      | N     | G3         | PFTB            | 1996-2007 | Molau                       | Bjork <i>et al.</i> 2007; Unpubl. data  |
| TUSSOCK TUNDRA      | 68.20  | 18.30   | 1000  | WET      | N     | G4         | PFTB            | 1995-2006 | Molau                       | Molau 2010                              |
| WET SEDGE           | 68.20  | 18.30   | 1000  | WET      | N     | W1         | PFTB            | 1994-2007 | Molau                       | Molau 1997; Unpubl. data                |
| BIS H               | 78.18  | 15.75   | 120   | MOIST    | Y     | W1         | PFA             | 2003-2009 | Jónsdóttir                  | Unpubl. data                            |
| BIS L               | 78.18  | 15.75   | 100   | MOIST    | Y     | W1         | PFA             | 2003-2009 | Jónsdóttir                  | Unpubl. data                            |
| CAS H               | 78.18  | 15.75   | 120   | MOIST    | Y     | P2         | PFA             | 2003-2009 | Jónsdóttir                  | Unpubl. data                            |
| CAS L               | 78.18  | 15.75   | 100   | DRY      | Y     | P2         | PFA             | 2003-2009 | Jónsdóttir                  | Unpubl. data                            |
| DRY H               | 78.18  | 15.75   | 120   | DRY      | Y     | P1         | PFA             | 2003-2009 | Jónsdóttir                  | Unpubl. data                            |
| DRY L               | 78.18  | 15.75   | 100   | DRY      | Y     | P1         | PFA             | 2003-2009 | Jónsdóttir                  | Unpubl. data                            |
| MES PHOTO           | 78.10  | 16.04   | 30    | MOIST    | Y     | P2         | COVER           | 2003-2008 | Cooper                      | Cooper <i>et al.</i> 2006; Unpubl. data |
| WET PHOTO           | 78.10  | 16.04   | 25    | WET      | Y     | W1         | COVER           | 2003-2008 | Cooper                      | Cooper <i>et al.</i> 2006; Unpubl. data |
| ALPINE SNOWBED      | 43.45  | 41.69   | 2750  | MOIST    | N     | B3         | SHTCNT (GEN)    | 1996-2009 | Onipchenko                  | Unpubl. data                            |
| FVG LOW             | 43.45  | 41.69   | 2710  | MOIST    | N     | B3         | SHTCNT          | 1986-2009 | Onipchenko                  | Unpubl. data                            |
| FVG UPPER           | 43.45  | 41.69   | 2710  | MOIST    | N     | B3         | SHTCNT          | 1987-2009 | Onipchenko                  | Unpubl. data                            |
| LICHEN HEATH        | 43.45  | 41.69   | 2750  | MOIST    | N     | B3         | SHTCNT          | 1981-2008 | Onipchenko                  | Unpubl. data                            |
| LH69                | 65.94  | -18.11  | 90    | MOIST    | N     | W2         | COVER           | 1998-2005 | Magnusson                   | Magnusson <i>et al.</i> 2005            |
| MV51                | 65.78  | -18.27  | 160   | MOIST    | N     | W2         | COVER           | 1998-2005 | Magnusson                   | Magnusson <i>et al.</i> 2005            |
| MV52                | 65.77  | -18.28  | 160   | MOIST    | N     | G3         | COVER           | 1998-2005 | Magnusson                   | Magnusson <i>et al.</i> 2005            |
| BARREN SADDLE       | 40.05  | -105.58 | 3528  | DRY      | N     | B1         | PFT             | 1989-2006 | Spasojevic                  | Walker <i>et al.</i> 1994; Unpubl. data |
| DRY MEADOW SADDLE   | 40.05  | -105.58 | 3528  | DRY      | N     | B4         | PFT             | 1989-2006 | Spasojevic                  | Walker <i>et al.</i> 1994; Unpubl. data |
| FELLFIELD SADDLE    | 40.05  | -105.58 | 3528  | DRY      | N     | B4         | PFT             | 1989-2006 | Spasojevic                  | Walker <i>et al.</i> 1994; Unpubl. data |
| KLEIN               | 40.05  | -105.60 | 3500  | MOIST    | N     | G1         | PFA             | 1993-2000 | Walker, Klein               | Walker <i>et al.</i> 1994; Unpubl. data |
| MOIST MEADOW SADDLE | 40.05  | -105.58 | 3528  | MOIST    | N     | G1         | PFT             | 1989-2006 | Spasojevic                  | Walker <i>et al.</i> 1994; Unpubl. data |
| ORD. DRY MEADOW     | 40.05  | -105.58 | 3505  | DRY      | N     | B4         | COVER           | 1991-2001 | Ebert-May, Tweedie, Johnson | Unpubl. data                            |
| ORD. FELLFIELD      | 40.05  | -105.58 | 3505  | DRY      | N     | B4         | COVER           | 1991-2001 | Ebert-May, Tweedie, Johnson | Unpubl. data                            |
| ORD. MOIST MEADOW   | 40.05  | -105.58 | 3505  | MOIST    | N     | G1         | COVER           | 1991-2001 | Ebert-May, Tweedie, Johnson | Unpubl. data                            |
| ORD. MOIST SHRUB    | 40.05  | -105.58 | 3505  | MOIST    | N     | S2         | COVER           | 1991-2001 | Ebert-May, Tweedie, Johnson | Unpubl. data                            |
| ORD. WET MEADOW     | 40.05  | -105.58 | 3505  | WET      | N     | W1         | COVER           | 1991-2001 | Ebert-May, Tweedie, Johnson | Unpubl. data                            |
| ORD. SNOWBANK       | 40.05  | -105.58 | 3505  | WET      | N     | W1         | COVER           | 1991-2001 | Ebert-May, Tweedie, Johnson | Unpubl. data                            |
| SNOWBANK SADDLE     | 40.05  | -105.58 | 3528  | WET      | N     | W1         | PFT             | 1989-2006 | Spasojevic                  | Walker <i>et al.</i> 1994; Unpubl. data |
| WET MEADOW SADDLE   | 40.05  | -105.58 | 3528  | WET      | N     | W1         | PFT             | 1989-2006 | Spasojevic                  | Walker <i>et al.</i> 1994; Unpubl. data |
| SA16                | 65.47  | -18.70  | 580   | MOIST    | N     | G3         | COVER           | 1997-2005 | Magnusson                   | Magnusson <i>et al.</i> 2005            |
| SA17                | 65.47  | -18.69  | 590   | MOIST    | N     | G3         | COVER           | 1997-2005 | Magnusson                   | Magnusson <i>et al.</i> 2005            |
| SA19                | 65.48  | -18.90  | 510   | MOIST    | N     | G3         | COVER           | 1997-2005 | Magnusson                   | Magnusson <i>et al.</i> 2005            |
| COPECK G            | -36.90 | 147.27  | 1690  | DRY      | N     | S1/S2      | PFA             | 1988-2002 | Wahren                      | Unpubl. data                            |
| COPEHUT G           | -36.90 | 147.27  | 1690  | DRY      | N     | S1/S2      | PFA             | 1985-2002 | Wahren                      | Unpubl. data                            |
| CULTIVATION G       | -36.90 | 147.27  | 1680  | DRY      | N     | S1/S2      | PFA             | 1985-1998 | Wahren                      | Unpubl. data                            |

Table S1 cont'd.

| Study                   | Lat.   | Long.   | Elev. | Moisture | Perm. | Veg. Class | Sampling Metric | Years     | P.I.              | Reference                                    |
|-------------------------|--------|---------|-------|----------|-------|------------|-----------------|-----------|-------------------|----------------------------------------------|
| EASTBASE G              | -36.90 | 147.27  | 1645  | DRY      | N     | S1/S2      | PFA             | 1989-1998 | Wahren            | Unpubl. data                                 |
| FAINTER G               | -36.90 | 147.27  | 1770  | DRY      | N     | S1/S2      | PFA             | 1989-1998 | Wahren            | Unpubl. data                                 |
| JOHNSTONS G             | -36.90 | 147.27  | 1750  | DRY      | N     | S1/S2      | PFA             | 1992-1998 | Wahren            | Unpubl. data                                 |
| PV NEW G                | -36.90 | 147.27  | 1750  | DRY      | N     | S1/S2      | PFA             | 1992-1998 | Wahren            | Unpubl. data                                 |
| PV OUT G                | -36.90 | 147.27  | 1750  | DRY      | N     | S1/S2      | PFA             | 1989-1999 | Wahren            | Unpubl. data                                 |
| TADGELL G               | -36.90 | 147.27  | 1900  | DRY      | N     | S1/S2      | PFA             | 1989-1998 | Wahren            | Unpubl. data                                 |
| HE                      | 69.58  | -138.86 | 76    | MOIST    | Y     | G4         | PFA             | 1999-2009 | Myers-Smith       | Myers-Smith <i>et al.</i> 2011; Unpubl. data |
| KO                      | 69.58  | -138.87 | 73    | DRY      | Y     | P1         | PFA             | 1999-2009 | Myers-Smith       | Myers-Smith <i>et al.</i> 2011; Unpubl. data |
| RMBL                    | 37.95  | -106.98 | 2920  | MIXED    | N     | S1/S2      | BIOMASS         | 1991-2005 | Harte             | Harte <i>et al.</i> 2006                     |
| TUNDRA                  | -64.78 | -64.07  | 30    | MOIST    | N     | S1         | COVER           | 1996-2006 | Day               | Day <i>et al.</i> 2008; Unpubl. data         |
| SVERDRUP                | 79.14  | -79.62  | 461   | DRY      | Y     | P1         | COVER           | 1992-2009 | Levesque          | Levesque 1997; Unpubl. data                  |
| F1                      | 43.54  | 142.87  | 1710  | DRY      | N     | S1         | PFA             | 2002-2007 | Kudo              | Kudo <i>et al.</i> 2010                      |
| F2                      | 43.55  | 142.86  | 1910  | DRY      | N     | P2         | PFA             | 2002-2007 | Kudo              | Kudo <i>et al.</i> 2010                      |
| S1                      | 43.55  | 142.87  | 1820  | MOIST    | N     | G3         | PFA             | 2002-2007 | Kudo              | Kudo <i>et al.</i> 2010                      |
| S2                      | 43.55  | 142.86  | 1820  | MOIST    | N     | G3         | PFA             | 2002-2007 | Kudo              | Kudo <i>et al.</i> 2010                      |
| MOSS HEATH              | 64.28  | -21.08  | 120   | DRY      | N     | MH         | PFTB            | 1996-2007 | Jónsdóttir        | Jónsdóttir <i>et al.</i> 2005; Unpubl. data  |
| PALSA                   | 64.57  | -18.60  | 600   | DRY      | Y     | G2         | PFA             | 1984-2007 | Thorhallsdottir   | Unpubl. data                                 |
| SALIXHEATH              | 64.57  | -18.60  | 600   | DRY      | N     | S1         | PFA             | 1984-2007 | Thorhallsdottir   | Unpubl. data                                 |
| HH100                   | 63.56  | -20.17  | 5     | MOIST    | N     | G3         | COVER           | 1998-2005 | Magnusson         | Magnusson <i>et al.</i> 2005                 |
| RT81                    | 63.99  | -21.16  | 30    | MOIST    | N     | G3         | COVER           | 1998-2005 | Magnusson         | Magnusson <i>et al.</i> 2005                 |
| VE82                    | 63.97  | -21.17  | 15    | MOIST    | N     | W2         | COVER           | 1998-2005 | Magnusson         | Magnusson <i>et al.</i> 2005                 |
| DRY ITEX                | 68.63  | -149.59 | 720   | DRY      | Y     | P2         | PFTB            | 1994-2007 | Gould             | Wahren <i>et al.</i> 2005; Unpubl. Data      |
| IMNAVAIT GRID           | 68.61  | -149.61 | 899   | MOIST    | Y     | G4         | PFTB            | 1989-2007 | Gould             | Unpubl. data                                 |
| LTER HEATH              | 68.60  | -149.60 | 745   | DRY      | Y     | P2         | BIOMASS         | 1996-2006 | Shaver            | Gough <i>et al.</i> 2002; Unpubl data        |
| LTER MOIST ACIDIC TUSS. | 68.60  | -149.60 | 745   | MOIST    | Y     | G4         | BIOMASS         | 1999-2006 | Shaver            | Hobbie <i>et al.</i> 2005; Unpubl data       |
| LTER WETSEGE            | 68.60  | -149.60 | 745   | WET      | Y     | W1         | BIOMASS         | 1994-2001 | Shaver            | Shaver <i>et al.</i> 1998; Unpubl. data      |
| MOIST ITEX              | 68.63  | -149.59 | 720   | MOIST    | Y     | P2         | PFTB            | 1994-2008 | Gould             | Wahren <i>et al.</i> 2005; Unpubl. data      |
| SAG WETSEGE2            | 68.60  | -149.60 | 745   | WET      | Y     | W1         | BIOMASS         | 1988-2001 | Shaver            | Shaver <i>et al.</i> 1998; Unpubl. data      |
| TUSSOCK 1981PLOTS       | 68.63  | -149.58 | 745   | MOIST    | Y     | G4         | BIOMASS         | 1982-2000 | Shaver            | Shaver <i>et al.</i> 2001; Unpubl. data      |
| TUSSOCK GRID            | 68.62  | -149.61 | 731   | MOIST    | Y     | G4         | PFTB            | 1990-2008 | Gould             | Unpubl. data                                 |
| ALPINE                  | 46.47  | 9.58    | 2490  | MOIST    | N     | G2         | COVER           | 1994-2009 | Rixen             | Gugerli 1997; Unpubl. data                   |
| WOLFCREEK               | 61.56  | -135.13 | 1526  | DRY      | N     | P1         | PFA             | 1998-2008 | Loewen, Johnstone | Pieper <i>et al.</i> 2011                    |
| ABRASION PLATEAU        | 74.29  | -20.31  | 80    | DRY      | Y     | B1         | PFT             | 1997-2008 | Schmidt           | Schmidt <i>et al.</i> In review              |
| CASSIOPE HEATH          | 74.28  | -20.33  | 35    | MOIST    | Y     | P2         | PFT             | 1997-2008 | Schmidt           | Schmidt <i>et al.</i> In review              |
| DRYAS HEATH             | 74.29  | -20.29  | 150   | DRY      | Y     | P1         | PFT             | 1997-2008 | Schmidt           | Schmidt <i>et al.</i> In review              |
| FEN                     | 74.28  | -20.33  | 30    | WET      | Y     | W1         | PFT             | 1997-2008 | Schmidt           | Schmidt <i>et al.</i> In review              |
| GRASSLAND               | 74.28  | -20.33  | 45    | MOIST    | Y     | W1         | PFT             | 1997-2008 | Schmidt           | Schmidt <i>et al.</i> In review              |
| OPEN DRYAS VEGETATION   | 74.28  | -20.31  | 30    | DRY      | Y     | P1         | PFT             | 1997-2008 | Schmidt           | Schmidt <i>et al.</i> In review              |
| SALIX ARCTICA SNOWBED   | 74.28  | -20.32  | 45    | MOIST    | Y     | P1         | PFT             | 1997-2008 | Schmidt           | Schmidt <i>et al.</i> In review              |
| VACCINIUM HEATH         | 74.28  | -20.38  | 10    | MOIST    | Y     | P2         | PFT             | 1997-2008 | Schmidt           | Schmidt <i>et al.</i> In review              |

Table S1. Study details. Lat - Latitude(°N); Long - Longitude (°E); Elev - Elevation(m); Perm - and presence of near-surface permafrost (Y=Yes, N=No); Sampling metric (BIO= Biomass, PFA= Point frame all hits, PFTB = Point frame top bottom hits only, PFT = Point frame top hits only, COV= Cover, SHTCT = count of all or generative only (GEN) shoots, SUBLFREQ= subplot frequency); Vegetation type (based on CAVM classes wherever possible, see Walker *et al* 2005 for detailed descriptions: B1=Cryptogam, herb barren; B3=Noncarbonate mountain complex; B4=Carbonate mountain Complex; DT=Riparian terrace (Dryas-dominated); G1=Rush/grass, forb, cryptogam tundra; G2 = Graminoid, prostrate dwarf-shrub, forb tundra; G3=Non-tussock sedge, dwarf-shrub, moss tundra; G4=Tussock-sedge, dwarf-shrub, moss tundra; MH= Moss heath; P1=Prostrate dwarf-shrub, herb tundra; P2 = Prostrate/hemiprostrate dwarf-shrub tundra; RS = Riparian shrublands (willow-dominated); S1=Erect dwarf-shrub tundra; S2=Low-shrub tundra; W1=Sedge/grass, moss wetland; W2=Sedge, moss, dwarf-shrub wetland; W3=Sedge, moss, low-shrub wetland); Years - first and last years of study; P.I. - Principle Investigator of study; Reference - recent study site publication, if applicable.

#### Table S1 References:

- Bjork, R. G., Majdi, H., Klemetsson, L., Lewis-Jonsson, L. & Molau, U. Long-term warming effects on root morphology, root mass distribution, and microbial activity in two dry tundra plant communities in northern Sweden. *New Phytologist* **176**, 862-873 (2007).
- Cooper, E. J., Jónsdóttir, I. S. & Pahud, A. Grazing by captive Barnacle geese affects graminoid growth and productivity on Svalbard. *Memoirs of NIPR (Japanese Polar Research)* **59**, 1-15 (2006).
- Day, T. A., Ruhland, C. T. & Xiong, F. S. Warming increases aboveground plant biomass and C stocks in vascular-plant-dominated Antarctic tundra. *Global Change Biology* **14**, 1827-1843 (2008).
- Gough, L., Wookey, P. A. & Shaver, G. R. Dry heath arctic tundra responses to long-term nutrient and light manipulation. *Arctic Antarctic and Alpine Research* **34**, 211-218 (2002).
- Gugerli, F. Reproductive biology of *Saxifraga oppositifolia* L. and *S. biflora* All. in alpine populations. PhD Thesis, University of Zürich, (1997).

- Harte, J., Saleska, S. & Shih, T. Shifts in plant dominance control carbon-cycle responses to experimental warming and widespread drought. *Environ. Res. Lett.* **1**, (2006).
- Hill, G. B. & Henry, G. H. R. Responses of High Arctic wet sedge tundra to climate warming since 1980. *Global Change Biology* **17**, 276-287 (2011).
- Hobbie, S. E., Gough, L. & Shaver, G. R. Species compositional differences on different-aged glacial landscapes drive contrasting responses of tundra to nutrient addition. *Journal of Ecology* **93**, 770-782 (2005).
- Hofgaard, A., Lokken, J. O., Dalen, L. & Hytteborn, H. Comparing warming and grazing effects on birch growth in an alpine environment - a 10-year experiment. *Plant Ecology & Diversity* **3**, 19-27 (2010).
- Hollister, R. D., Webber, P. J. & Tweedie, C. E. The response of Alaskan arctic tundra to experimental warming: differences between short- and long-term responses. *Global Change Biology* **11**, 525-536 (2005).
- Hudson, J. M. G. & Henry, G. H. R. Increased plant biomass in a High Arctic heath community from 1981 to 2008. *Ecology* **90**, 2657-2663 (2009).
- Keuper, F. et al. A Race for Space? How *Sphagnum fuscum* stabilizes vegetation composition during long-term climate manipulations. *Global Change Biology*, **17**, 2162-2171 (2011).
- Klanderud, K. & Totland, O. The relative role of dispersal and local interactions for alpine plant community diversity under simulated climate warming. *Oikos* **116**, 1279-1288 (2007).
- Jonsdottir, I. S., Magnusson, B., Gudmundsson, J., Elmarsdottir, A. & Hjartarson, H. Variable sensitivity of plant communities in Iceland to experimental warming. *Global Change Biology* **11**, 553-563 (2005).
- Jorgenson, J. C., A. K. Johnson, & B. E. Reitz. Ecological monitoring at long-term study sites in the Arctic National Wildlife Refuge: 1997 - 1999. *Annual report, Arctic NWR, U.S. Fish and Wildlife Service*, 77 pp. (2000).
- Jorgenson, J. C., Reitz, B. E., Boyle, B. H., Johnson, J. & Emers, M. Ecological monitoring at long-term study sites in the Arctic National Wildlife Refuge: initial projects in 1996. *Annual report, Arctic NWR, U.S. Fish & Wildlife Service*. 62 pp. (1997).

- Jorgenson, J. C., Hoef, J. M. V. & Jorgenson, M. T. Long-term recovery patterns of arctic tundra after winter seismic exploration. *Ecological Applications* **20**, 205-221 (2010).
- Kudo, G., Kimura, M., Kasagi, T., Kawai, Y. & Hirao, A. S. Habitat-specific responses of alpine plants to climatic amelioration: Comparison of fellfield to snowbed communities. *Arctic Antarctic and Alpine Research* **42**, 438-448 (2010).
- Lévesque, E. Plant distribution and colonization in extreme polar deserts, Ellesmere Island, Canada. PhD thesis, University of Toronto, (1997).
- Magnússon, B. et al. Vöktun á ástandi og líffræðilegri fjölbreytni úthaga 2005 (Monitoring of rangeland condition and biodiversity of pastures in Iceland in 2005) Fræðaping landbúnaðarins 2006, 221 – 233 (2006).
- Molau, U. Responses to natural climatic variation and experimental warming in two tundra plant species with contrasting life forms: *Cassiope tetragona* and *Ranunculus nivalis*. *Global Change Biology* **3**, 97-107 (1997).
- Molau, U. Long-term impacts of observed and induced climate change on tussock tundra near its southern limit in northern Sweden. *Plant Ecology & Diversity* **3**, 29-34 (2010).
- Myers-Smith, I. H. et al. Expansion of canopy-forming willows over the 20th century on Herschel Island. *Ambio* **40**, 610-623 (2011).
- Pieper, S. J., Loewen, V., Gill, M. & Johnstone., J. F. Plant responses to natural and experimental variations in temperature in alpine tundra, southern Yukon, Canada. *Arctic, Antarctic, and Alpine Research* **43**, 442-456 (2011).
- Rinnan, R., Michelsen, A., Bååth, E. & Jonasson, S. Mineralization and carbon turnover in subarctic heath soil as affected by warming and additional litter. *Soil Biology and Biochemistry* **39**, 3014-3023 (2007).
- Rinnan, R., Stark, S. & Tolvanen, A. Responses of vegetation and soil microbial communities to warming and simulated herbivory in a subarctic heath. *Journal of Ecology* **97**, 788-800 (2009).
- Shaver, G. R. et al. Biomass and CO<sub>2</sub> flux in wet sedge tundras: Responses to nutrients, temperature, and light. *Ecological Monographs* **68**, 75-97 (1998).

Thórhallsdóttir, T. E. Áhrif miðlunarlóns á gróður og jarðveg í Þjórsárverum (The impact of a hydroelectric reservoir on vegetation and soil in Thjórsárver). University of Iceland, Reykjavík, Iceland, 135 pp. (1994).

Wahren, C. H. A., Walker, M. D. & Bret-Harte, M. S. Vegetation responses in Alaskan arctic tundra after 8 years of a summer warming and winter snow manipulation experiment. *Global Change Biology* **11**, 537-552 (2005).

Walker, D. A., Lewis, B. E., Krantz, W. B., Price, E. T. & Table, R. D. Hierarchic studies of snow-ecosystem interactions: A 100-year snow-alteration experiment. In *Proceeding of the Fiftieth Annual Eastern and Western Snow Conference*. (ed M. Ferrick) 407-414 (1994).

Walker, D. A., *et al.* The Circumpolar Arctic vegetation map. *Journal of Vegetation Science* **16**, 267-282 (2005).

Table S2.

| Response Group   | $\Delta^{\circ}\text{C}$ | $\Delta^{\circ}\text{C} \times \text{Mean}^{\circ}\text{C}$ | $\Delta^{\circ}\text{C} \times \text{Perm}$ | $\Delta^{\circ}\text{C} \times \text{Moisture}$ |
|------------------|--------------------------|-------------------------------------------------------------|---------------------------------------------|-------------------------------------------------|
| LITTER           | 0.100                    | 0.934                                                       | 0.287                                       | 0.115                                           |
| DIVERSITY (VASC) | 0.682                    | 0.485                                                       | 0.081                                       | 0.543                                           |
| BARE GROUND      | 0.241                    | 0.818                                                       | 0.458                                       | 0.332                                           |
| SHRUB(TOTAL)     | 0.105                    | <b>0.015</b>                                                | 0.200                                       | 0.083                                           |
| DECIDUOUS        | 0.361                    | <b>0.006*</b>                                               | 0.245                                       | <b>0.031</b>                                    |
| EVERGREEN        | 0.155                    | 0.178                                                       | 0.737                                       | 0.264                                           |
| DWARF            | 0.349                    | 0.298                                                       | 0.910                                       | 0.751                                           |
| LOW              | <b>0.042</b>             | 0.504                                                       | 0.233                                       | 0.844                                           |
| TALL             | <b>0.041</b>             | 0.175                                                       | 0.446                                       | 0.874                                           |
| GRAMINOID(TOTAL) | 0.828                    | 0.130                                                       | 0.130                                       | 0.156                                           |
| GRASS            | 0.910                    | 0.127                                                       | 0.205                                       | 0.424                                           |
| RUSH             | 0.320                    | 0.325                                                       | 0.212                                       | <b>0.047</b>                                    |
| SEDGE            | 0.587                    | 0.086                                                       | 0.698                                       | 0.128                                           |
| FORB(TOTAL)      | 0.379                    | 0.292                                                       | <b>0.012*</b>                               | 0.290                                           |
| LICHEN(TOTAL)    | 0.175                    | 0.322                                                       | 0.510                                       | 0.140                                           |
| MOSS(TOTAL)      | 0.216                    | 0.412                                                       | 0.111                                       | 0.971                                           |

Table S2. Wald test results ( $P$  values) correlating temporal changes in vegetation response groups to hypothesized drivers of change: summer temperature change ( $\Delta^{\circ}\text{C}$ ) and interactions between summer temperature change and mean summer temperature ( $\Delta^{\circ}\text{C} \times \text{Mean}^{\circ}\text{C}$ ); presence of near surface permafrost ( $\Delta^{\circ}\text{C} \times \text{Perm}$ ); and soil moisture class ( $\Delta^{\circ}\text{C} \times \text{Moisture}$ ). Bold indicates significance at  $P < 0.05$ , stars indicate significance at  $P < 0.05$  after accounting for multiple tests.
